# Supplementary material for: The Disabilities of the Arm, Shoulder and Hand Questionnaire (DASH) can measure the impairment, activity limitations and participation restriction constructs from the International Classification of Functioning, Disability and Health (ICF)
Source: PubMed Central journal article supplement (PMC2533660; doi:10.1186/1471-2474-9-114), 2008-08-20
Supplement: 1471-2474-9-114-S1.pdf [file 1471-2474-9-114-S1.pdf]

\*Single time point measurement.

\*IMPAIRMENT SCORE CALCULATION.

RECODE

  pain activitypain tingling weakness stiffness (SYSMIS=0) .

EXECUTE .

COUNT

  ICOUNT = pain activitypain tingling weakness stiffness (1) pain  
  activitypain tingling weakness stiffness (2) pain activitypain tingling  
  weakness stiffness (3) pain activitypain tingling weakness stiffness (4)  
  pain activitypain tingling weakness stiffness (5) .

VARIABLE LABELS ICOUNT 'NUMBER OF IMPAIRMENT ITEMS COMPLETED' .

EXECUTE .

COMPUTE I AVERAGE = (pain + activitypain + tingling + weakness + stiffness )  
  /ICOUNT .

VARIABLE LABELS I AVERAGE 'AVERAGE I SCORE'

EXECUTE .

COMPUTE IMPAIRMENT = (I AVERAGE-1) \* 25.

VARIABLE LABELS IMPAIRMENT 'IMPAIRMENT SCORE OUT OF 100'

EXECUTE.

\*ACTIVITY LIMITATIONS SCORE CALCULATION.

RECODE

  jar write key meal door shelf chores yard bed object lightbulb hair wash  
  sweater knife (SYSMIS=0) .

EXECUTE .

COUNT

  ACOUNT = jar write key meal door shelf chores yard bed object lightbulb  
  hair wash sweater knife (1) jar write key meal door shelf chores yard bed  
  object lightbulb hair wash sweater knife (2) jar write key meal door shelf  
  chores yard bed object lightbulb hair wash sweater knife (3) jar write key  
  meal door shelf chores yard bed object lightbulb hair wash sweater knife  
  (4) jar write key meal door shelf chores yard bed object lightbulb hair  
  wash sweater knife (5) .

VARIABLE LABELS ACOUNT 'NUMBER OF ACTIVITY LIMITATIONS ITEMS COMPLETED' .

EXECUTE .

COMPUTE A AVERAGE = (jar + write + key + meal + door + shelf + chores + yard + bed + object +  
  lightbulb +  
  hair + wash + sweater + knife)/ACOUNT.

VARIABLE LABELS A AVERAGE 'AVERAGE A SCORE'

EXECUTE.

COMPUTE ACTIVITYLIM = (A AVERAGE-1) \* 25.

VARIABLE LABELS ACTIVITYLIM 'ACTIVITY LIMITATIONS SCORE OUT OF 100'

EXECUTE.

\*PARTICIPATION RESTRICTION SCORE CALCULATION.

RECODE

```

transport social (SYSMIS=0) .
EXECUTE .
COUNT
  PCOUNT = transport social (1) transport social (2) transport
  social (3) transport social (4) transport social (5) .
VARIABLE LABELS PCOUNT 'NUMBER OF PARTICIPATION RESTRICTIONS ITEMS COMPLETED' .
EXECUTE .
COMPUTE PAVERAGE = (transport + social)/PCOUNT .
VARIABLE LABELS PAVERAGE 'AVERAGE P SCORE'
EXECUTE .
COMPUTE PARTRESTRICT = (PAVERAGE-1) * 25.
VARIABLE LABELS PARTRESTRICT 'PARTICIPATIONS RESTRICTIONS SCORE OUT OF 100'
EXECUTE.

```

\*ACTIVITY LIMITATIONS AND PARTICIPATION RESTRICTIONS MIXED ITEMS CALCULATION.

```

RECODE
  sex knitting tennis badminton daily (SYSMIS=0) .
EXECUTE .
COUNT
  APCOUNT = sex knitting tennis badminton daily (1) sex knitting tennis badminton
  daily (2) sex knitting tennis badminton daily (3) sex knitting tennis badminton
  daily (4) sex knitting tennis badminton daily (5) .
VARIABLE LABELS APCOUNT 'NUMBER OF A AND P MIXED ITEMS COMPLETED' .
EXECUTE .
COMPUTE APAVERAGE = (sex + knitting + tennis + badminton + daily)/APCOUNT .
VARIABLE LABELS APAVERAGE 'AVERAGE AP SCORE'
EXECUTE .
COMPUTE APMIXED = (APAVERAGE-1) * 25.
VARIABLE LABELS APMIXED 'A AND P MIXED SCORE OUT OF 100'
EXECUTE.

```

\*Time 2 measurement.

\*IMPAIRMENT SCORE CALCULATION Time 2.

```

RECODE
  pain2 activitypain2 tingling2 weakness2 stiffness2 (SYSMIS=0) .
EXECUTE .
COUNT
  IT2COUNT = pain2 activitypain2 tingling2 weakness2 stiffness2 (1) pain2 activitypain2 tingling2
  weakness2 stiffness2 (2)
  pain2 activitypain2 tingling2 weakness2 stiffness2 (3) pain2 activitypain2 tingling2 weakness2
  stiffness2 (4)
  pain2 activitypain2 tingling2 weakness2 stiffness2 (5) .
VARIABLE LABELS IT2COUNT 'NUMBER OF IMPAIRMENT ITEMS COMPLETED AT TIME 2' .
EXECUTE .
COMPUTE IT2AVERAGE = (pain2 + activitypain2 + tingling2 + weakness2 + stiffness2 )
  /IT2COUNT .
VARIABLE LABELS IT2AVERAGE 'AVERAGE I SCORE AT TIME 2'
EXECUTE .
COMPUTE IMPAIRMENTT2 = (IT2AVERAGE-1) * 25.

```

VARIABLE LABELS IMPAIRMENTT2 'IMPAIRMENT SCORE OUT OF 100 AT TIME 2'  
EXECUTE.

\*ACTIVITY LIMITATIONS SCORE CALCULATION.

RECODE

jar2 write2 key2 meal2 door2 shelf2 chores2 yard2 bed2 object2 lightbulb2 hair2 wash2  
sweater2 knife2 (SYSMIS=0) .

EXECUTE .

COUNT

AT2COUNT = jar2 write2 key2 meal2 door2 shelf2 chores2 yard2 bed2 object2 lightbulb2 hair2 wash2  
sweater2 knife2 (1) jar2 write2 key2 meal2 door2 shelf2 chores2 yard2 bed2 object2 lightbulb2 hair2  
wash2

sweater2 knife2 (2) jar2 write2 key2 meal2 door2 shelf2 chores2 yard2 bed2 object2 lightbulb2 hair2  
wash2

sweater2 knife2 (3) jar2 write2 key2 meal2 door2 shelf2 chores2 yard2 bed2 object2 lightbulb2 hair2  
wash2

sweater2 knife2 (4) jar2 write2 key2 meal2 door2 shelf2 chores2 yard2 bed2 object2 lightbulb2 hair2  
wash2

sweater2 knife2 (5) .

VARIABLE LABELS AT2COUNT 'NUMBER OF ACTIVITY LIMITATIONS ITEMS COMPLETED AT TIME  
2' .

EXECUTE .

COMPUTE AT2AVERAGE = (jar2 + write2 + key2 + meal2 + door2 + shelf2 + chores2 + yard2 + bed2 +  
object2 + lightbulb2 +  
hair2 + wash2 + sweater2 + knife2)/AT2COUNT.

VARIABLE LABELS AT2AVERAGE 'AVERAGE A SCORE AT TIME 2'

EXECUTE.

COMPUTE ACTIVITYLIMIT2 = (AT2AVERAGE-1) \* 25.

VARIABLE LABELS ACTIVITYLIMIT2 'ACTIVITY LIMITATIONS SCORE OUT OF 100 AT TIME 2'

EXECUTE.

\*PARTICIPATION RESTRICTION SCORE CALCULATION.

RECODE

transport2 social2 (SYSMIS=0) .

EXECUTE .

COUNT

PT2COUNT = transport2 social2 (1) transport2 social2 (2) transport2  
social2 (3) transport2 social2 (4) transport2 social2 (5) .

VARIABLE LABELS PT2COUNT 'NUMBER OF PARTICIPATION RESTRICTIONS ITEMS COMPLETED  
AT TIME 2' .

EXECUTE .

COMPUTE PT2AVERAGE = (transport2 + social2)/PT2COUNT .

VARIABLE LABELS PT2AVERAGE 'AVERAGE P SCORE AT TIME 2'

EXECUTE .

COMPUTE PARTRESTRICTT2 = (PT2AVERAGE-1) \* 25.

VARIABLE LABELS PARTRESTRICTT2 'PARTICIPATIONS RESTRICTIONS SCORE OUT OF 100 AT  
TIME 2'

EXECUTE.

\*ACTIVITY LIMITATIONS AND PARTICIPATION RESTRICTIONS MIXED ITEMS CALCULATION.

RECODE

sex2 knitting2 tennis2 badminton2 daily2 (SYSMIS=0) .

EXECUTE .

COUNT

APT2COUNT = sex2 knitting2 tennis2 badminton2 daily2 (1) sex2 knitting2 tennis2 badminton2 daily2  
(2) sex2 knitting2 tennis2 badminton2 daily2 (3) sex2 knitting2 tennis2 badminton2 daily2 (4) sex2  
knitting2 tennis2 badminton2 daily2 (5) .

VARIABLE LABELS APT2COUNT 'NUMBER OF A AND P MIXED ITEMS COMPLETED AT TIME 2' .

EXECUTE .

COMPUTE APT2AVERAGE = (sex2 + knitting2 + tennis2 + badminton2 + daily2)/APT2COUNT .

VARIABLE LABELS APT2AVERAGE 'AVERAGE AP SCORE AT TIME 2'

EXECUTE .

COMPUTE APT2MIXED = (APT2AVERAGE-1) \* 25.

VARIABLE LABELS APT2MIXED 'A AND P MIXED SCORE OUT OF 100 AT TIME 2'

EXECUTE.
