# Supplementary material for: The Disabilities of the Arm, Shoulder and Hand Questionnaire (DASH) can measure the impairment, activity limitations and participation restriction constructs from the International Classification of Functioning, Disability and Health (ICF)
Source: PubMed Central journal article supplement (PMC2533660; doi:10.1186/1471-2474-9-114), 2008-08-20
Supplement: 1471-2474-9-114-S2.pdf [file 1471-2474-9-114-S2.pdf]

|    | jar | write | key | meal | door | shelf | chores | yard | bed | briefcase | object | lightbulb |
|----|-----|-------|-----|------|------|-------|--------|------|-----|-----------|--------|-----------|
| 1  | .   | .     | .   | .    | .    | .     | .      | .    | .   | .         | .      | .         |
| 2  | .   | .     | .   | .    | .    | .     | .      | .    | .   | .         | .      | .         |
| 3  | .   | .     | .   | .    | .    | .     | .      | .    | .   | .         | .      | .         |
| 4  | .   | .     | .   | .    | .    | .     | .      | .    | .   | .         | .      | .         |
| 5  | .   | .     | .   | .    | .    | .     | .      | .    | .   | .         | .      | .         |
| 6  | .   | .     | .   | .    | .    | .     | .      | .    | .   | .         | .      | .         |
| 7  | .   | .     | .   | .    | .    | .     | .      | .    | .   | .         | .      | .         |
| 8  | .   | .     | .   | .    | .    | .     | .      | .    | .   | .         | .      | .         |
| 9  | .   | .     | .   | .    | .    | .     | .      | .    | .   | .         | .      | .         |
| 10 | .   | .     | .   | .    | .    | .     | .      | .    | .   | .         | .      | .         |

|    | hair | wash | sweater | knife | knitting | tennis | badminton | transport | sex | social | daily | pain |
|----|------|------|---------|-------|----------|--------|-----------|-----------|-----|--------|-------|------|
| 1  | .    | .    | .       | .     | .        | .      | .         | .         | .   | .      | .     | .    |
| 2  | .    | .    | .       | .     | .        | .      | .         | .         | .   | .      | .     | .    |
| 3  | .    | .    | .       | .     | .        | .      | .         | .         | .   | .      | .     | .    |
| 4  | .    | .    | .       | .     | .        | .      | .         | .         | .   | .      | .     | .    |
| 5  | .    | .    | .       | .     | .        | .      | .         | .         | .   | .      | .     | .    |
| 6  | .    | .    | .       | .     | .        | .      | .         | .         | .   | .      | .     | .    |
| 7  | .    | .    | .       | .     | .        | .      | .         | .         | .   | .      | .     | .    |
| 8  | .    | .    | .       | .     | .        | .      | .         | .         | .   | .      | .     | .    |
| 9  | .    | .    | .       | .     | .        | .      | .         | .         | .   | .      | .     | .    |
| 10 | .    | .    | .       | .     | .        | .      | .         | .         | .   | .      | .     | .    |

|    | activitypain | tingling | weakness | stiffness | sleeping | confidence | wtechnique | wusual | wwell | wtime | stechnique | splay |
|----|--------------|----------|----------|-----------|----------|------------|------------|--------|-------|-------|------------|-------|
| 1  | .            | .        | .        | .         | .        | .          | .          | .      | .     | .     | .          | .     |
| 2  | .            | .        | .        | .         | .        | .          | .          | .      | .     | .     | .          | .     |
| 3  | .            | .        | .        | .         | .        | .          | .          | .      | .     | .     | .          | .     |
| 4  | .            | .        | .        | .         | .        | .          | .          | .      | .     | .     | .          | .     |
| 5  | .            | .        | .        | .         | .        | .          | .          | .      | .     | .     | .          | .     |
| 6  | .            | .        | .        | .         | .        | .          | .          | .      | .     | .     | .          | .     |
| 7  | .            | .        | .        | .         | .        | .          | .          | .      | .     | .     | .          | .     |
| 8  | .            | .        | .        | .         | .        | .          | .          | .      | .     | .     | .          | .     |
| 9  | .            | .        | .        | .         | .        | .          | .          | .      | .     | .     | .          | .     |
| 10 | .            | .        | .        | .         | .        | .          | .          | .      | .     | .     | .          | .     |

|    | swell | stime | BLANK | jar2 | write2 | key2 | meal2 | door2 | shelf2 | chores2 | yard2 | bed2 |
|----|-------|-------|-------|------|--------|------|-------|-------|--------|---------|-------|------|
| 1  | .     | .     |       | .    | .      | .    | .     | .     | .      | .       | .     | .    |
| 2  | .     | .     |       | .    | .      | .    | .     | .     | .      | .       | .     | .    |
| 3  | .     | .     |       | .    | .      | .    | .     | .     | .      | .       | .     | .    |
| 4  | .     | .     |       | .    | .      | .    | .     | .     | .      | .       | .     | .    |
| 5  | .     | .     |       | .    | .      | .    | .     | .     | .      | .       | .     | .    |
| 6  | .     | .     |       | .    | .      | .    | .     | .     | .      | .       | .     | .    |
| 7  | .     | .     |       | .    | .      | .    | .     | .     | .      | .       | .     | .    |
| 8  | .     | .     |       | .    | .      | .    | .     | .     | .      | .       | .     | .    |
| 9  | .     | .     |       | .    | .      | .    | .     | .     | .      | .       | .     | .    |
| 10 | .     | .     |       | .    | .      | .    | .     | .     | .      | .       | .     | .    |

|    | briefcase2 | object2 | lightbulb2 | hair2 | wash2 | sweater2 | knife2 | knitting2 | tennis2 | badminton2 | transport2 | sex2 |
|----|------------|---------|------------|-------|-------|----------|--------|-----------|---------|------------|------------|------|
| 1  | .          | .       | .          | .     | .     | .        | .      | .         | .       | .          | .          | .    |
| 2  | .          | .       | .          | .     | .     | .        | .      | .         | .       | .          | .          | .    |
| 3  | .          | .       | .          | .     | .     | .        | .      | .         | .       | .          | .          | .    |
| 4  | .          | .       | .          | .     | .     | .        | .      | .         | .       | .          | .          | .    |
| 5  | .          | .       | .          | .     | .     | .        | .      | .         | .       | .          | .          | .    |
| 6  | .          | .       | .          | .     | .     | .        | .      | .         | .       | .          | .          | .    |
| 7  | .          | .       | .          | .     | .     | .        | .      | .         | .       | .          | .          | .    |
| 8  | .          | .       | .          | .     | .     | .        | .      | .         | .       | .          | .          | .    |
| 9  | .          | .       | .          | .     | .     | .        | .      | .         | .       | .          | .          | .    |
| 10 | .          | .       | .          | .     | .     | .        | .      | .         | .       | .          | .          | .    |

|    | social2 | daily2 | pain2 | activitypain | tingling2 | weakness2 | stiffness2 | sleeping2 | confidence | wtechnique | wusual2 | wwell2 |
|----|---------|--------|-------|--------------|-----------|-----------|------------|-----------|------------|------------|---------|--------|
| 1  | .       | .      | .     | .            | .         | .         | .          | .         | .          | .          | .       | .      |
| 2  | .       | .      | .     | .            | .         | .         | .          | .         | .          | .          | .       | .      |
| 3  | .       | .      | .     | .            | .         | .         | .          | .         | .          | .          | .       | .      |
| 4  | .       | .      | .     | .            | .         | .         | .          | .         | .          | .          | .       | .      |
| 5  | .       | .      | .     | .            | .         | .         | .          | .         | .          | .          | .       | .      |
| 6  | .       | .      | .     | .            | .         | .         | .          | .         | .          | .          | .       | .      |
| 7  | .       | .      | .     | .            | .         | .         | .          | .         | .          | .          | .       | .      |
| 8  | .       | .      | .     | .            | .         | .         | .          | .         | .          | .          | .       | .      |
| 9  | .       | .      | .     | .            | .         | .         | .          | .         | .          | .          | .       | .      |
| 10 | .       | .      | .     | .            | .         | .         | .          | .         | .          | .          | .       | .      |

|    | wtime2 | stechnique | splay2 | swell2 | stime2 |
|----|--------|------------|--------|--------|--------|
| 1  | .      | .          | .      | .      | .      |
| 2  | .      | .          | .      | .      | .      |
| 3  | .      | .          | .      | .      | .      |
| 4  | .      | .          | .      | .      | .      |
| 5  | .      | .          | .      | .      | .      |
| 6  | .      | .          | .      | .      | .      |
| 7  | .      | .          | .      | .      | .      |
| 8  | .      | .          | .      | .      | .      |
| 9  | .      | .          | .      | .      | .      |
| 10 | .      | .          | .      | .      | .      |
